# Supplementary material
Source: HighWire-hosted journal article supplement (https://jnm.snmjournals.org/highwire/filestream/94185/field_highwire_adjunct_files/0/jnm084392_Supplemental_Figs.pdf)
Supplement: jnm084392_Supplemental_Figs.pdf [file jnm084392_Supplemental_Figs.pdf]

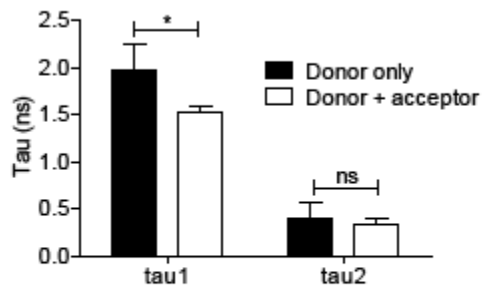

**SUPPLEMENTAL FIGURE 1.** MDA-MB-468 cells were exposed for various times to AF88-EGF (green) and stained for EGFR using Cy3-anti-EGFR antibody (red). FLIM lifetime measurements of MDA-MB-468 cells exposed to 4 nM AF488-EGF (donor only) with or without Cy3-conjugated EGFR (donor + acceptor). In cells stained with Cy3-anti-EGFR, AF488 lifetime was reduced, showing that FRET between AF488 and Cy3 occurs and is indicative of interaction between EGF and EGFR. A second, faster component, that was unaffected by the addition of acceptor Cy3, is attributed to autofluorescence of the cells. Results are shown as averages of three experiments  $\pm$  standard deviation.

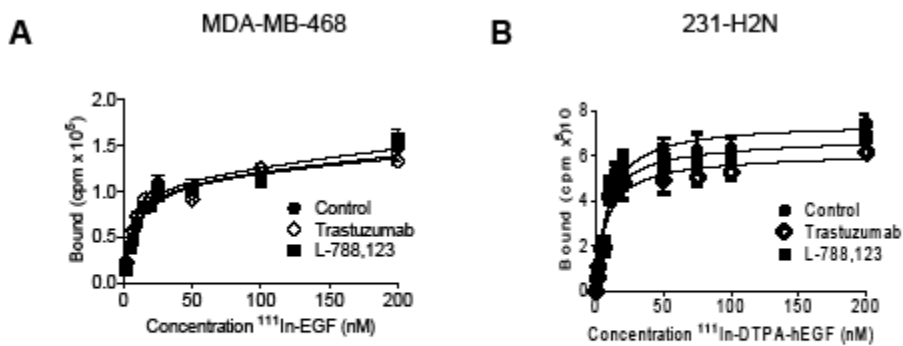

**SUPPLEMENTAL FIGURE 2.** Receptor binding of <sup>111</sup>In-DTPA-hEGF. (A) MDA-MB-468 or (B) 231-H2N cells were exposed to L-788,123 (3 μM) or trastuzumab (10 μg/mL) and to <sup>111</sup>In-DTPA-hEGF. Saturation receptor binding curves were generated.

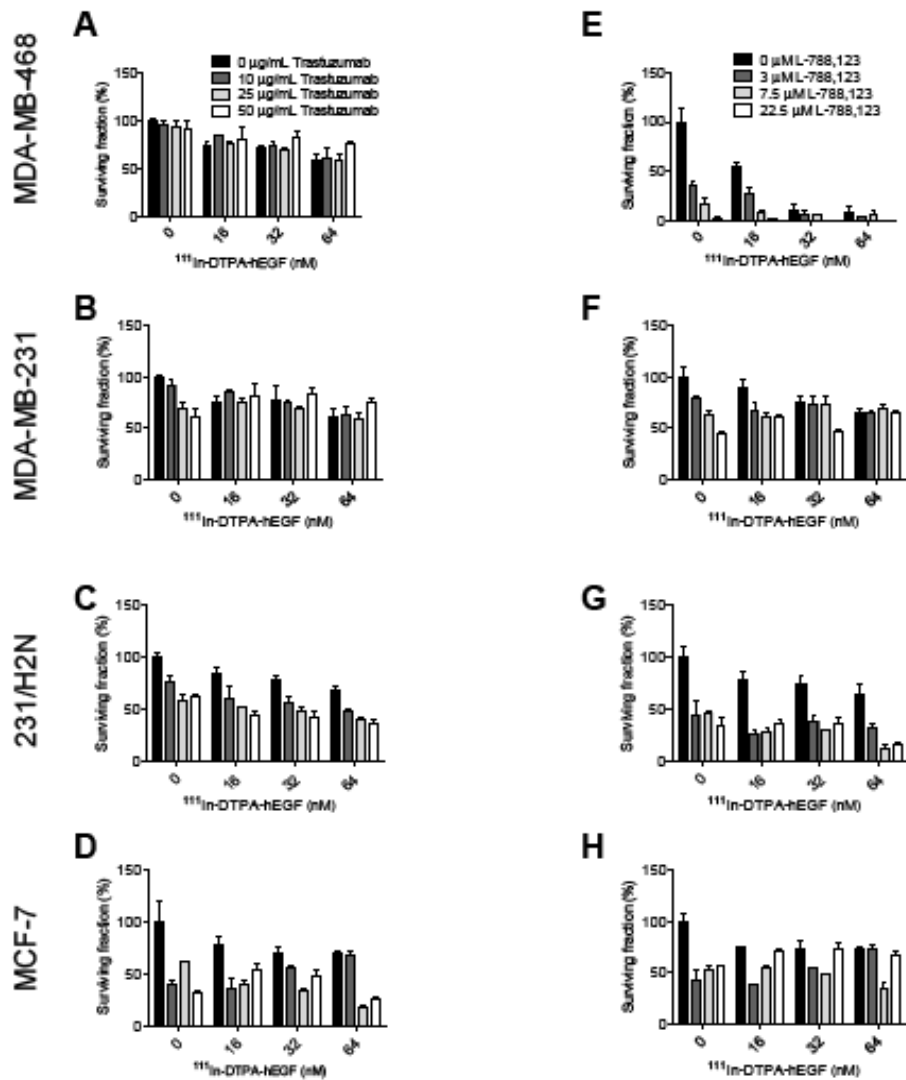

**SUPPLEMENTAL FIGURE 3.** (A-D) MDA-MB-468, MDA-MB-231, 231-H2N and MCF-7 cells were exposed to a range of concentrations of  $^{111}\text{In-DTPA-hEGF}$  alone, trastuzumab alone or a combination of both agents for 24 h. (E-H) Breast cancer cell lines were exposed to a range of concentrations of  $^{111}\text{In-DTPA-hEGF}$  alone, L-788,123 alone or a combination of both agents for 24 h. Colony-counting assays were performed and survival curves generated. These data were used to calculate combination indices. Results are shown as averages of three experiments  $\pm$  standard deviation.
